# Supplementary material
Source: PubMed Central journal article supplement (PMC7710584)
Supplement: NIHMS1626291-supplement-1.pdf [file NIHMS1626291-supplement-1.pdf]

## **Supplementary Data**

### **Title**

**Copy number alteration burden differentially impacts immune profiles and molecular features of hepatocellular carcinoma**

### **Authors**

Laia Bassaganyas<sup>1,#</sup>, Roser Pinyol<sup>1,#</sup>, Roger Esteban-Fabró<sup>1,#</sup>, Laura Torrens<sup>1</sup>, Sara Torrecilla<sup>1</sup>, Catherine E. Willoughby<sup>1</sup>, Sebastià Franch-Expósito<sup>2</sup>, Maria Vila-Casadesús<sup>3</sup>, Itziar Salaverria<sup>4,5</sup>, Robert Montal<sup>1</sup>, Vincenzo Mazzaferro<sup>6</sup>, Jordi Camps<sup>2</sup>, Daniela Sia<sup>7</sup>, Josep M Llovet\*<sup>1,7,8</sup>

#shared first authorship

### **Affiliations**

<sup>1</sup>Liver Cancer Translational Research Group, Liver Unit, Institut d'Investigacions Biomèdiques August Pi i Sunyer (IDIBAPS), Hospital Clínic, Universitat de Barcelona, Barcelona, Catalonia, Spain.

<sup>2</sup>Gastrointestinal and Pancreatic Oncology Group, Institut d'Investigacions Biomèdiques August Pi i Sunyer (IDIBAPS), Barcelona, Catalonia, Spain

<sup>3</sup>Bioinformatics Unit, CIBERehd, Barcelona, Catalonia, Spain

<sup>4</sup>Lymphoid Neoplasms Program, Institut d'Investigacions Biomèdiques August Pi i Sunyer (IDIBAPS), Barcelona, Catalonia, Spain

<sup>5</sup>Tumores Hematológicos, Centro de Investigación Biomédica en Red de Cáncer (CIBERonc), Madrid, Spain

<sup>6</sup>Gastrointestinal Surgery and Liver Transplantation Unit, National Cancer Institute, Milan, Italy.

<sup>7</sup>Mount Sinai Liver Cancer Program, Division of Liver Diseases, Tisch Cancer Institute, Icahn School of Medicine at Mount Sinai, New York, USA.

<sup>8</sup>Institució Catalana de Recerca i Estudis Avançats (ICREA), Barcelona, Catalonia, Spain.

**Corresponding author**

\*Josep M. Llovet; Liver Cancer Translational Research Laboratory, Liver Unit, IDIBAPS-Hospital Clinic, Rosselló 153, 08036, Barcelona, Catalonia, Spain; Tel. 0034-932.279.155; Email address: [jmllovet@clinic.cat](mailto:jmllovet@clinic.cat)

## **Content:**

- **Supplementary Methods**
  - Study cohorts*
  - Histological evaluation*
  - Genomic profiling*
  - CNA data processing and determination of the CNA level*
  - Molecular characterization*
  - Immune characterization*
  - Mutational profiling*
  - Statistical analysis*
- **Supplementary Figure 1.** Flow chart summarizing the study design and distribution of broad and focal copy number scores (BS and FS, respectively).
- **Supplementary Figure 2.** BS-low and BS-high patterns of CNAs in the validation cohort display distinct molecular and immune profiles.
- **Supplementary Figure 3.** Burden of focal chromosomal alterations impacts on molecular features but has no effect on the immune profiles.
- **Supplementary Figure 4.** BS-low HCC tumors exhibit enrichment of immune traits.
- **Supplementary Figure 5.** Pre-neoplastic lesions classified as high-BS displayed trends towards reduced molecular features of active antitumor immunity.
- **Supplementary Figure 6.** Correlation between immunity and BS in very early HCCs.
- **Supplementary Figure 7.** Candidate determinants of immune profiles observed for low-BS and high-BS HCC tumors.
- **Supplementary Figure 8.** High-BS HCCs present widespread demethylation.
- **Supplementary Figure 9.** Number of broad losses correlate with low cytolytic activity in HCC.
- **Supplementary Table 1:** Clinical characteristics of HCC patients used in the study.
- **Supplementary Table 2:** Descriptive analysis of broad score (left) and focal score (right) distributions in the TCGA pan-cancer cohort (n = 10635).

- **Supplementary Table 3:** Excel sheet presenting the INGENUITY® Pathway Analysis of the discovery cohort according to broad scores (BS).
- **Supplementary Table 4:** Excel sheet with the clinico-pathological data displayed according to BS and FS.
- **Supplementary Table 5:** Molecular and immune characterization of the discovery cohort according to broad scores (BS).
- **Supplementary Table 6:** Molecular and immune characterization of the validation cohort according to broad scores (BS).
- **Supplementary Table 7:** Molecular and immune characterization of the discovery cohort according to focal scores (FS).
- **Supplementary Table 8:** Molecular and immune characterization of the validation cohort according to focal scores (FS).
- **Supplementary Table 9:** Gene groups representing immune clusters as major determinants of immunogenicity.
- **Supplementary Table 10:** Publicly available gene signatures used in the study.
- **References**

## **Supplementary Methods**

### *Study cohorts*

For the purpose of the study, a total of 452 tumor and paired adjacent non-tumor liver tissues were analyzed (Supplementary Figure 1A), including a discovery cohort of 107 surgically-resected fresh frozen (FF) samples (HEPTROMIC)[1] and a validation cohort of 345 Liver Hepatocellular Carcinoma (LIHC) patients publicly available from The Cancer Genome Atlas (TCGA)[2]. Samples from the discovery cohort were retrospectively collected in the setting of the HCC Genomic Consortium upon institutional review board approval and patients' written informed consent, as previously reported[1]. Detailed information of clinical and pathological features of these samples is summarized in Supplementary Table 1. Also, we analyzed one 'in-house' cohort with 25 patients showing low-grade (n=9) and high-grade (n=16) pre-malignant dysplastic nodules (LGDN and HGDN, respectively); and 18 very early HCCs (veHCC) corresponding to tumors of less than 2cm in size from the HEPTROMIC cohort. These two last cohorts had been previously published[1,3]. Finally, a publicly available transcriptome dataset corresponding to pre-treatment samples of 65 cancer patients treated with either nivolumab (43%) or pembrolizumab (57%), both anti-PD-1 immune checkpoint inhibitors[4], was used to run the subclass mapping.

### *Samples' histological evaluation*

Samples were evaluated histopathologically to determine presence of microscopic vascular invasion (0=absent; 1=present), tumor degree of

differentiation (Edmondson-Steiner grades G1 to G4), and tumor immune infiltration (0= absent; 1=mild; 2=mild-moderate; 3=moderate; 4=abundant). Presence of lymphoid aggregates was assessed in the non-tumor liver tissue sections.

### *Genomic profiling*

For DNA extraction of the discovery cohort (HEPTROMIC), we used the Invitrogen ChargeSwitch genomic DNA Mini Tissue kit (Invitrogen). Median sample storage time from collection to DNA extraction was 7 years. Samples (n=107) were analysed with Human OmniExpress Exome8v1 SNParray (Illumina, San Diego, USA). Expression and methylation data of the HEPTROMIC cohort had been previously reported[1], and was available for 102 out of the 107 HCC samples with good quality Single Nucleotide Polymorphism (SNP) array profiles. Data are available under the Gene Expression Omnibus accession number: GSE153338 and GSE63898. Samples from the validation set (TCGA-LIHC, n=345) were analyzed with Affymetrix 6.0 SNP array (Affymetrix, CA, USA). TCGA RNA-sequencing data (Illumina HiSeq 2000) were available through the cBioportal (<https://www.cbioportal.org/>), and their corresponding methylation data was retrieved from the NCI Genomic Data Commons (GDC) using the R package *TCGAbiolinks*.

### *CNA data processing and determination of the CNA level*

The HEPTROMIC SNP array data were processed using the software Genome Studio Genotyping Module v2.0 (Illumina) to extract Log R Ratio (LRR) and B-Allele Frequency (BAF) values. Segmented copy number data were calculated using the SAAS-CNV software[5] with default parameters. TCGA-LIHC pre-processed level-3 segmented copy number data with LRR values were directly downloaded from the Broad Institute GDAC FireBrowser (<http://gdac.broadinstitute.org>). The determination of ploidy and aberrant tumor cell fraction (purity) of HEPTROMIC samples was carried out with ASCATv2.4 software[6], whereas TCGA-LIHC ploidy estimation was obtained from COSMIC database[7] and purity values were obtained from published data[8]. First, we used CNApp [9] with default parameters to refine the copy number segments by adjusting sample-specific CNA thresholds using sample purity values and applying a re-segmentation procedure. Then, we categorized the chromosomal segments as either broad or focal. Broad CNAs were defined as those segments spanning  $\geq 50\%$  of a chromosome arm while the rest of CNAs were considered focal events[10,11]. Finally, we used CNApp to quantify the individual CNA burdens of each sample within the HEPTROMIC (n=107) and the TCGA-LIHC (n=345) cohorts. The CNApp provides two scores per sample, one that reflect the genomic burden of all broad CNAs (the so called broad score, BS), and one that reflects all focal CNAs (focal score, FS). These scores are based on the number, amplitude and length of the CNAs. In the event of broad and focal CNAs affecting the same genomic region, they were contemplated separately within BS and FS,

respectively. A more detailed description of the scores can be found in Franch-Exposito et al. [9]. Broad and focal scores for the remaining TCGA samples were also obtained from [9]. Copy number data from the two cohorts of dysplastic nodules were obtained from [3].

### *Molecular characterization*

For the molecular characterization of the HCC tumors according to their different aneuploidy profiles, both broad scores (BS) and focal scores (FS) in the HEPROMIC and TCGA-LIHC cohorts were dichotomized into low and high. High-BS threshold was set at  $\geq 11$  (the upper quartile of both the TCGA pan-cancer cohort and the discovery cohort), and low-BS at  $\leq 4$  (coinciding with the lower quartile in the discovery cohort). In terms of FS, low-FS samples were defined as those with  $FS \leq 13.5$ , while high-FS was defined as those with  $FS \geq 47$ , considering the quartile values in the discovery cohort. Tumors with BS and FS values between low and high score thresholds were classified as 'intermediate'. Genes deregulated in low-BS/FS or high-BS/FS were identified through the Comparative Marker Selection module of GenePattern, using a fold change (FC) $>1.5$  and an FDR $<0.05$ . Gene Set Enrichment Analysis (GSEA)[12], ssGSEA[13] (both GenePattern modules) and INGENUITY<sup>®</sup> Pathway Analysis software (IPA<sup>®</sup>) were used to assess enrichment of activated pathways in each group. Sample class predictions to identify molecular classes or enrichment of specific gene signatures (see Supplementary Table 9) were performed using the GenePattern Nearest Template Prediction module as in previous publications



[14]. Subclass mapping (SubMap) analysis (Gene Pattern), a bioinformatic method to quantitatively evaluate the similarity between independent cohorts, was used to measure similarity in gene expression between the HEPTROMIC cohort and a publicly available cohort of cancer patients treated with immune checkpoint inhibitors [4].

### *Immune characterization*

The tumor immunophenotype of samples from both discovery and validation cohorts was assessed with an *in-house* adapted version of the previously published Immunophenoscore[15]. We generated immunophenograms graphically representing the Spearman's correlation between the CNA scores and the expression of the 162 genes or groups of genes described as determinants of tumor immunogenicity (listed in Supplementary Table 8). Cytolytic activity of HEPTROMIC and TCGA-LIHC samples was calculated as the geometric mean of the genes granzyme A (GZMA) and perforin-1 (PRF1), as previously described[16]. Infiltration of immune cells in tumor tissue was inferred from expression data through the Immune Score obtained from the ESTIMATE software[17]. Pan-cancer ESTIMATE values for the 10,635 TCGA samples were directly obtained from the tool developers[17]. For the analysis of mutations and neo-antigens in the TCGA-LIHC cohort, the list of events per sample provided by Rooney et al.[16] was used. In order to identify candidate genes involved in determining the immune phenotypes observed for low-BS and high-BS samples, genes present in each copy number gain and loss were extracted using the

genome coordinates of each CNA segment, and a matrix with the frequency of each gene according to the broad CNA load (low-BS, high-BS, intermediate-BS) was generated. Significant differences were captured using a Fisher exact test, and multiple testing was corrected by FDR. B2M and HLA-DQB1 were identified as significantly different in terms of CNA among low-BS and high-BS simultaneously in the discovery and validation cohorts.

### *Mutational profiling*

The mutational landscape of the TCGA-LIHC cohort was obtained from Rooney et al.[16]. Mutations in *TERT* and *CTNNB1* in the HEPTROMIC cohort were assessed by Sanger sequencing.

### *Statistical analysis*

Statistical analysis was conducted using R (version 3.4.4). Specifically, we performed non-parametric tests for the comparison of distribution of continuous variables (Wilcoxon or Kruskal-Wallis tests) and binary counts (Fisher's exact test). For the assessment of correlations between two continuous variables, we used Spearman's rank correlation coefficient test. IBM-SPSS.v25 software was used for Kaplan-Meier analyses, log-rank tests and Cox regression modelling to evaluate the associations of molecular and clinical variables with overall survival and tumor recurrence. In all analysis, either a p-value <0.05 (two-sided) or an FDR<0.1 were considered to be statistically significant.

## Supplementary Figure 1

A

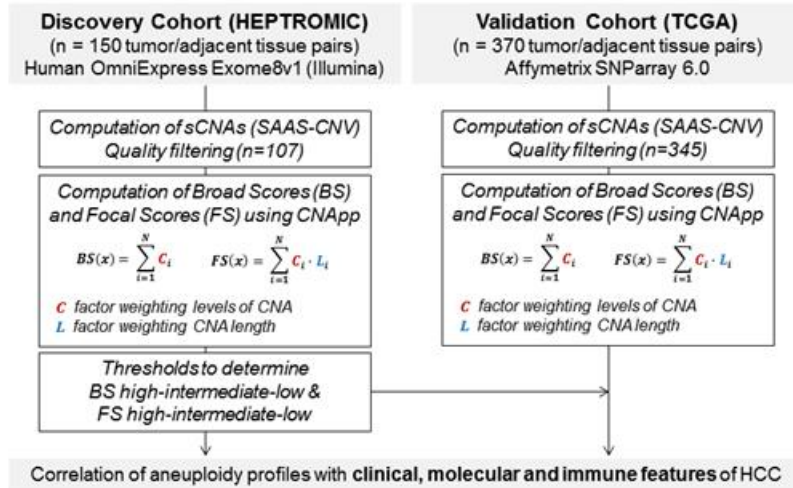

B

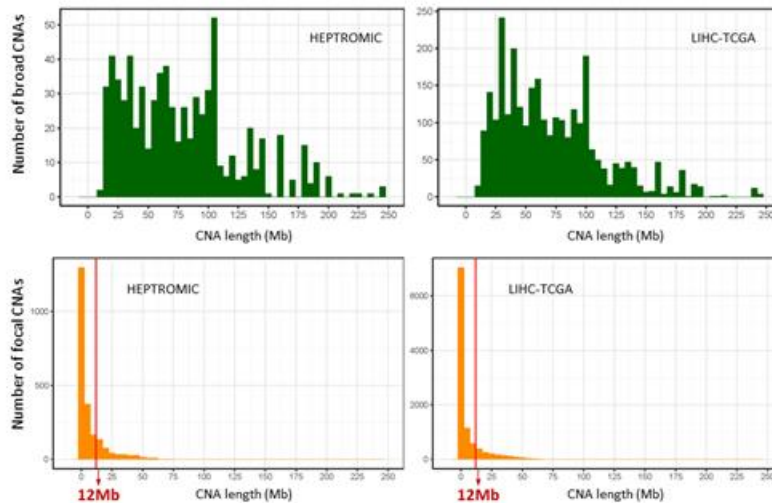

C

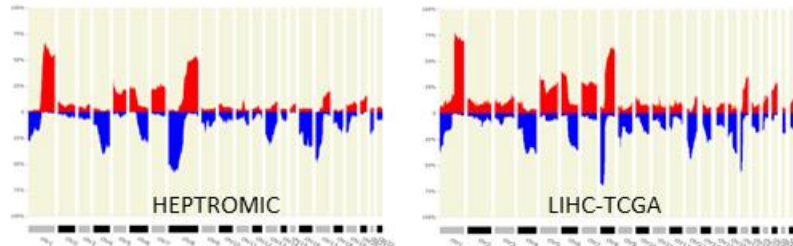

Supplementary Figure 1. Flow chart of the study and distribution of broad and focal copy number scores (BS and FS, respectively). (A) A total of 520

HCC samples, and their paired non-tumor adjacent tissue, were analysed in this study. A discovery cohort (HEPTROMIC) consisted of 150 fresh frozen HCCs, and a validation cohort was composed of 370 HCC samples (TCGA). (B) Distribution of copy-number and length of broad (in green) and focal (in orange) CNA segments in the discovery cohort (n=107, HEPTROMIC) and in the validation cohort (n=345, LIHC-TCGA). (C) Genomic frequency distributions of gains (red) and losses (blue) in the discovery and validation cohorts.

## Supplementary Figure 2

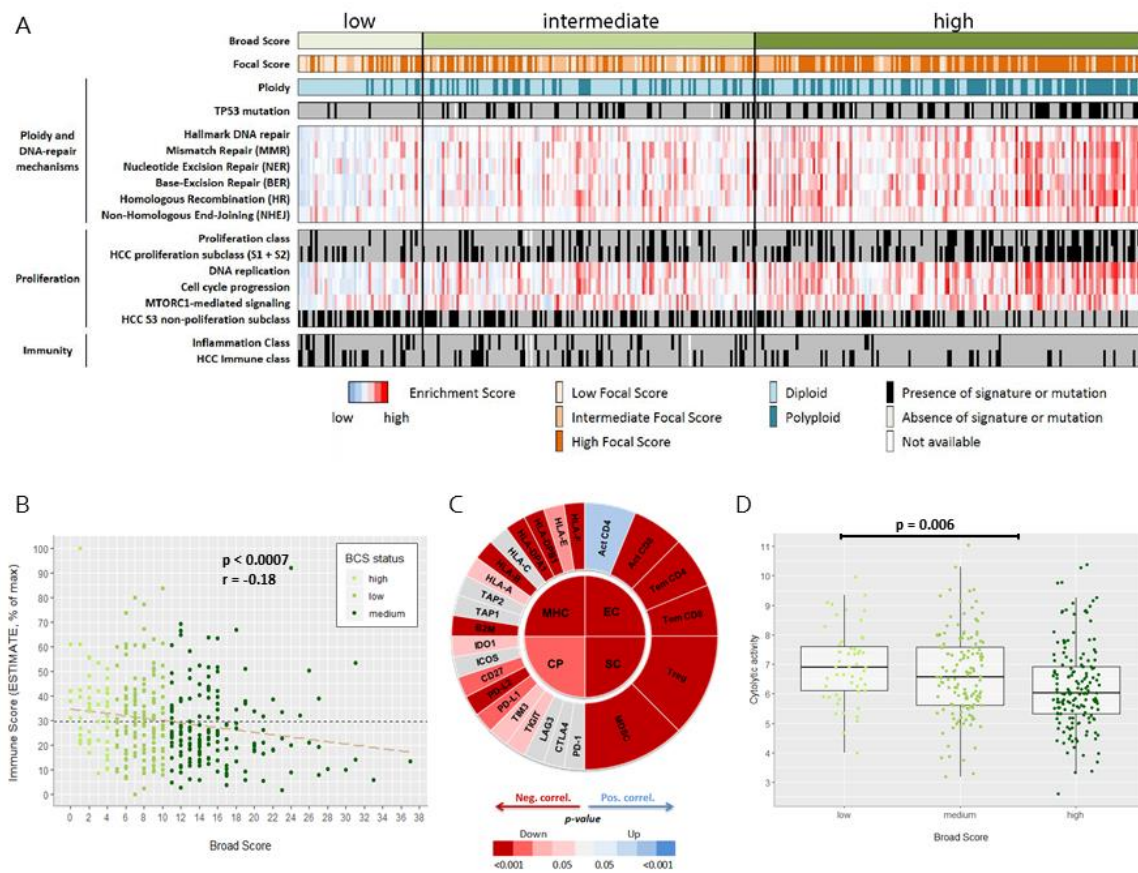

**Supplementary Figure 2. BS-low and BS-high patterns of CNAs in the validation cohort display also distinct molecular and immune profiles. (A)** BS-low tumors were significantly HLA-associated with high immune infiltration, diploidy and functional *TP53*. In contrast, BS-high HCCs were polyploid, proliferative and with low immune signaling. **(B)** Transcriptome-based estimation of immune cell infiltration according to broad chromosomal burdens (validation cohort). **(C)** Immunophenoscore diagram correlating BS with expression features of effector cells (EC), immune checkpoints (CP), major histocompatibility complex-related

components (MHC) and suppressor cells (SP). (D) BS-low HCCs exhibited higher cytolytic activity compared to the rest of tumors.

### Supplementary Figure 3

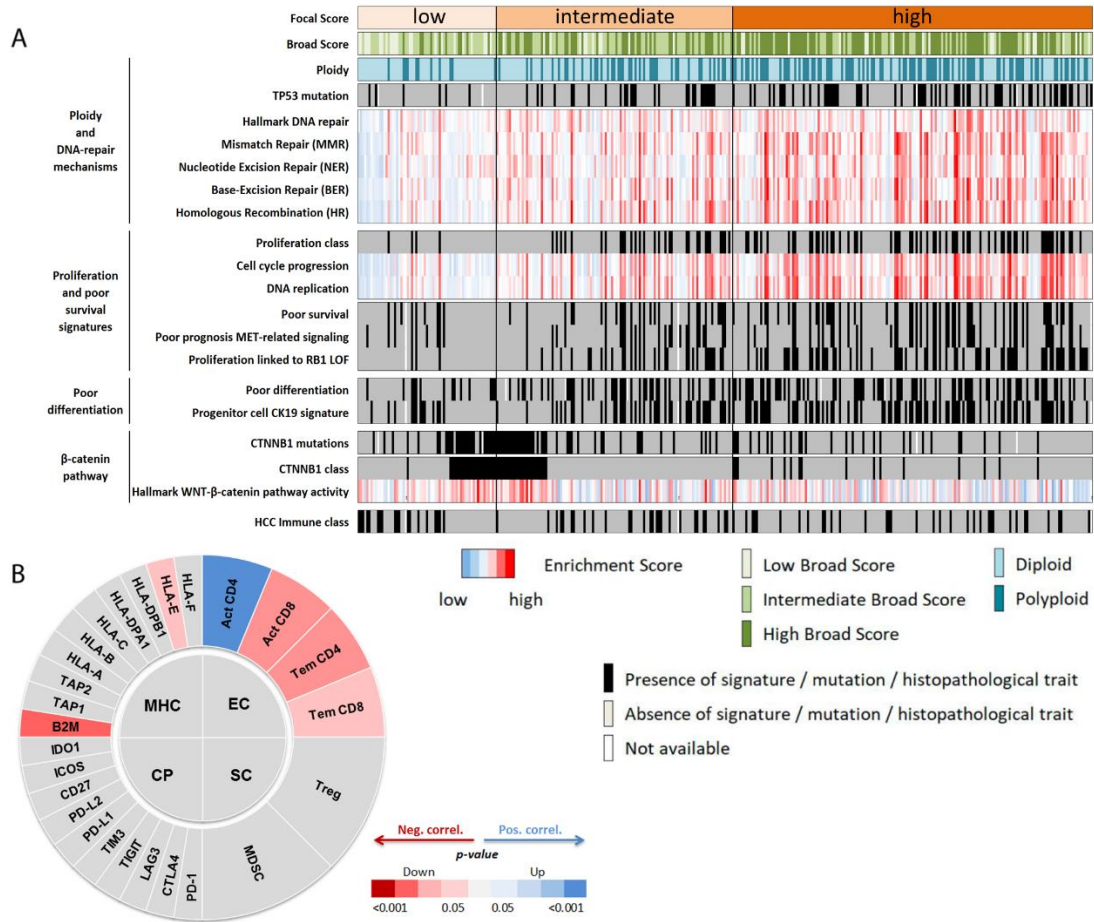

**Supplementary Figure 3. Burden of focal chromosomal alterations impacts on molecular features but has no effect on the immune profiles also in the validation cohort.** (A) Heatmap with data from the LIHC-TCGA cohort, demonstrating that HCC tumors with higher burden of focal events (high-FS) were mainly polyploid, enriched in poor prognosis and proliferation, and presented poor cell differentiation. In contrast, low/intermediate-FS tumors were enriched in Wnt- $\beta$ -catenin signaling. Overall, focal scores were not associated with immune features. (B) Immunophenoscore diagram displaying the absence of

correlation between FS and effector cells (EC), immune checkpoints (CP), major histocompatibility complex-related components (MHC) and suppressor cells (SP).



# Supplementary Figure 4

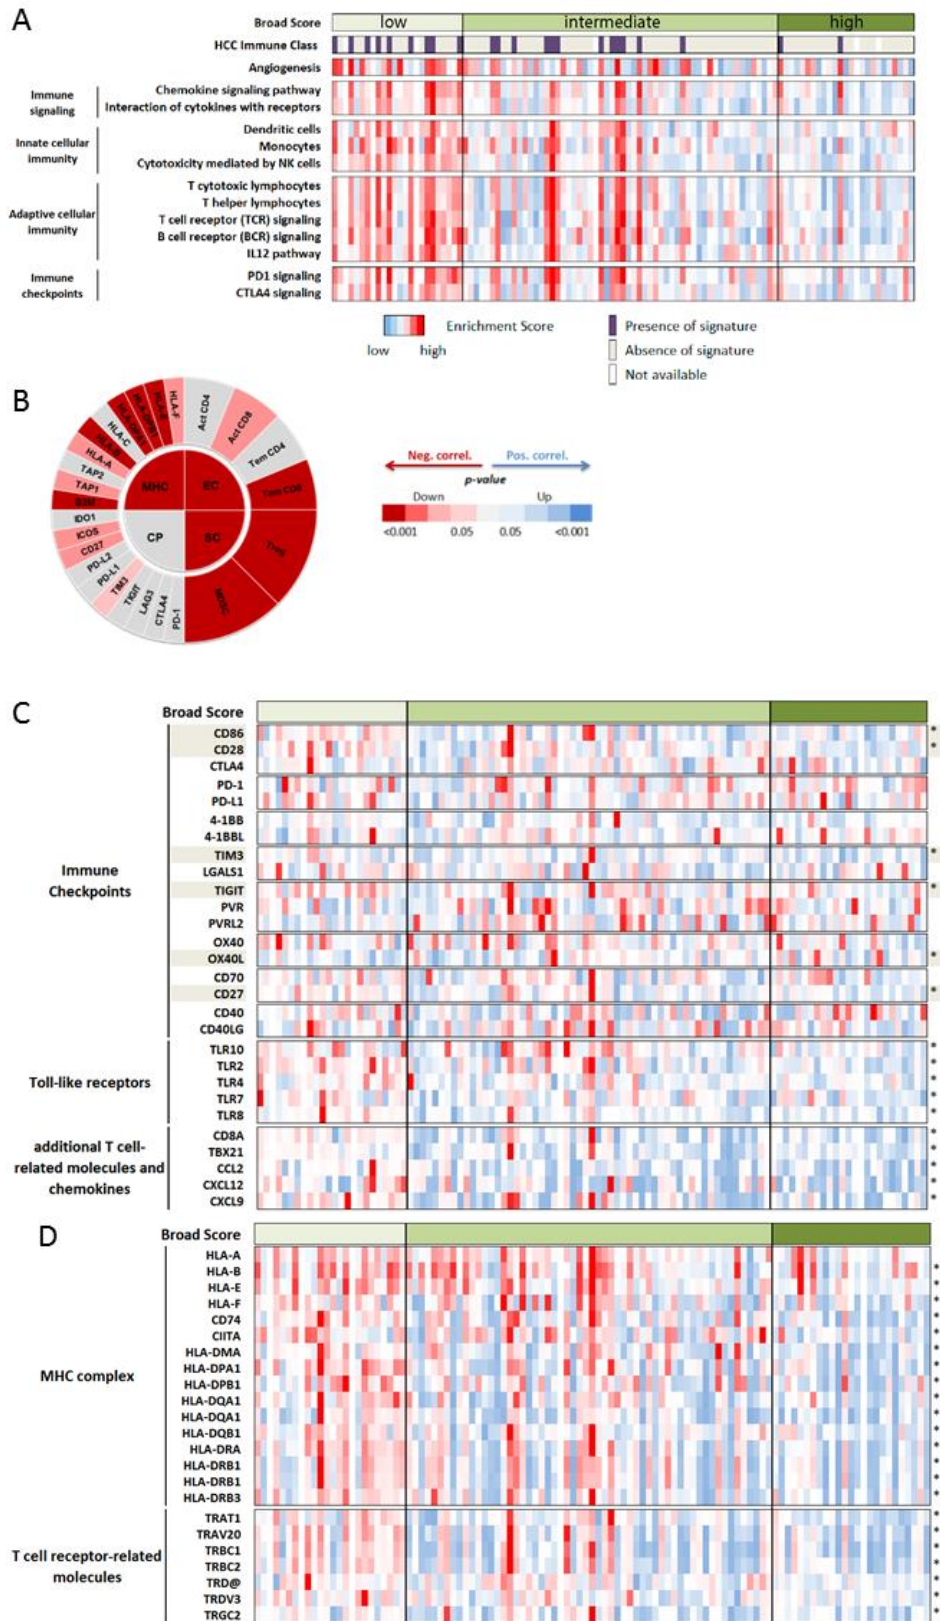

**Supplementary Figure 4. BS-low HCC tumors exhibit enrichment of immune traits.** (A) Heatmap with ssGSEA signatures related to immunity (discovery cohort), according to the broad score levels. (B) Immunophenoscore diagram correlating BS with expression features from effector cells (EC), immune checkpoints (CP), major histocompatibility complex-related components (MHC) and suppressor cells (SP). High-BSs were negatively correlated with features of EC, MHC and SC. (C) Heatmap displaying gene expression levels of immune checkpoints and immune receptors, according to the broad score levels. (D) Heatmap displaying gene expression levels of MHC-complex and T cell receptor-related molecules. In (C) and (D) gene expression levels are graded from red (high expression) to blue (low expression), and asterisks indicate significant differences in terms of expression between HCC tumors low-BS and high-BS.

# Supplementary Figure 5

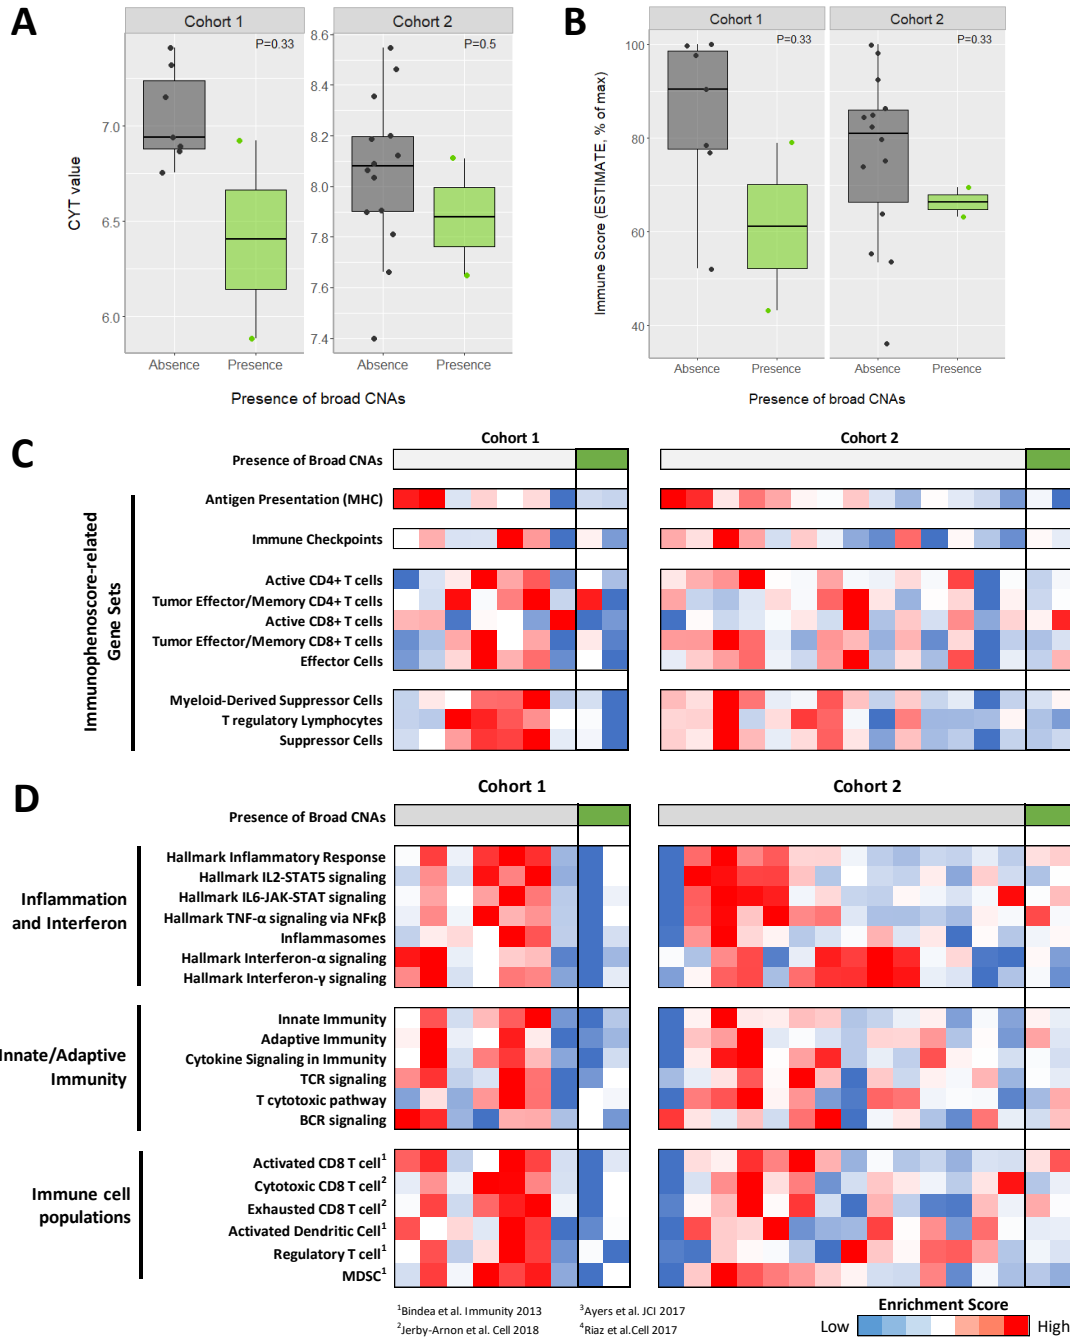

**Supplementary Figure 5. Pre-neoplastic lesions classified as high-BS displayed trends towards reduced molecular features of active antitumor immunity.** (A,B) The presence of broad CNAs (equivalent to high-BS) in pre-neoplastic lesions (high grade dysplastic nodules and low grade dysplastic nodules) is linked with a trend towards reduced (A) cytolytic activity and (B) expression-inferred immune cell infiltration using the ESTIMATE tool. (C,D) ssGSEA data indicating that broad CNAs in dysplastic nodules were linked to trends towards a reduced enrichment in transcriptomic features of effector cells, immune checkpoints, major histocompatibility complex-related components and suppressor cells (C), as well as trends towards reduced expression of immune-related pathways as observed with HCC tumors (D). P-values have been obtained from a Mann-Whitney-Wilcoxon test.

## Supplementary Figure 6

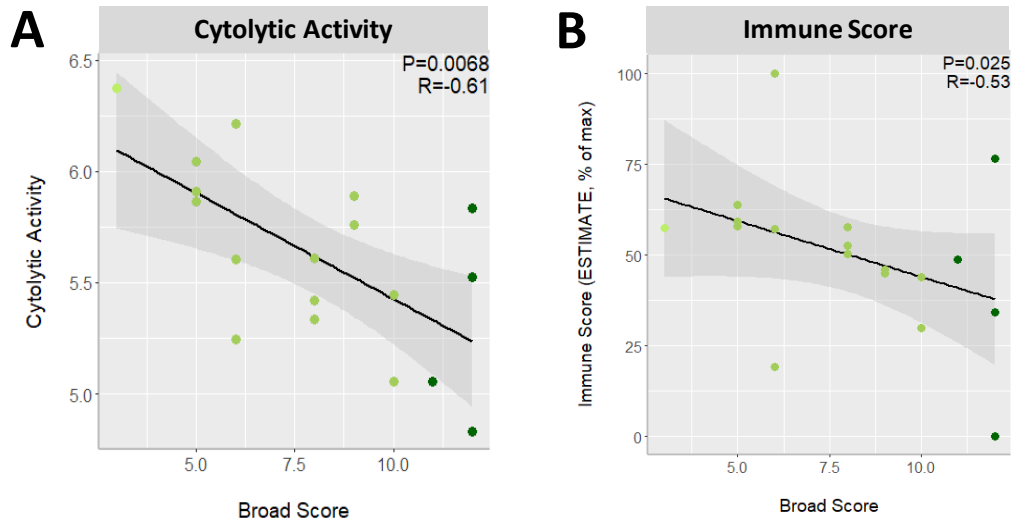

**Supplementary Figure 6. Correlation between immunity and BS in very early HCCs.** The associations between Broad Score (BS) and reduced antitumor immunity features were maintained among the subgroup of small HCCs in Heptronic (n=18). We observed that BS was negatively correlated with (A) Cytolytic activity and (B) expression-inferred immune cell infiltration using the ESTIMATE tool.

## Supplementary Figure 7

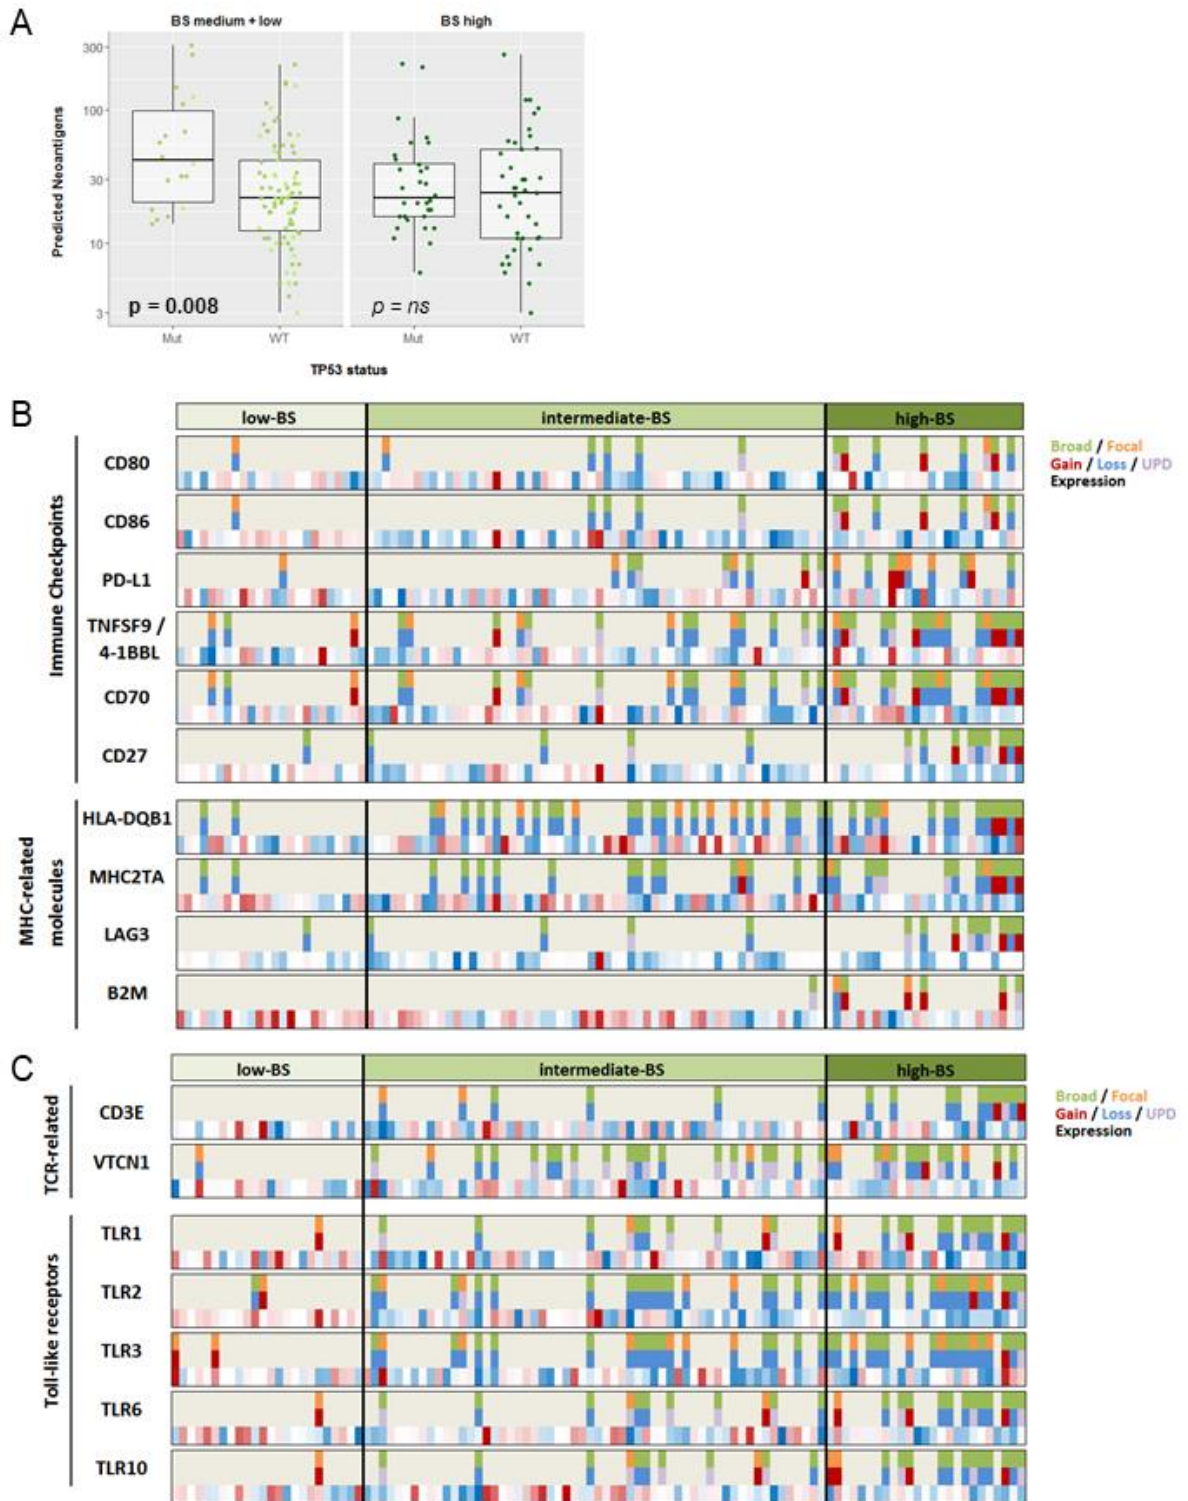

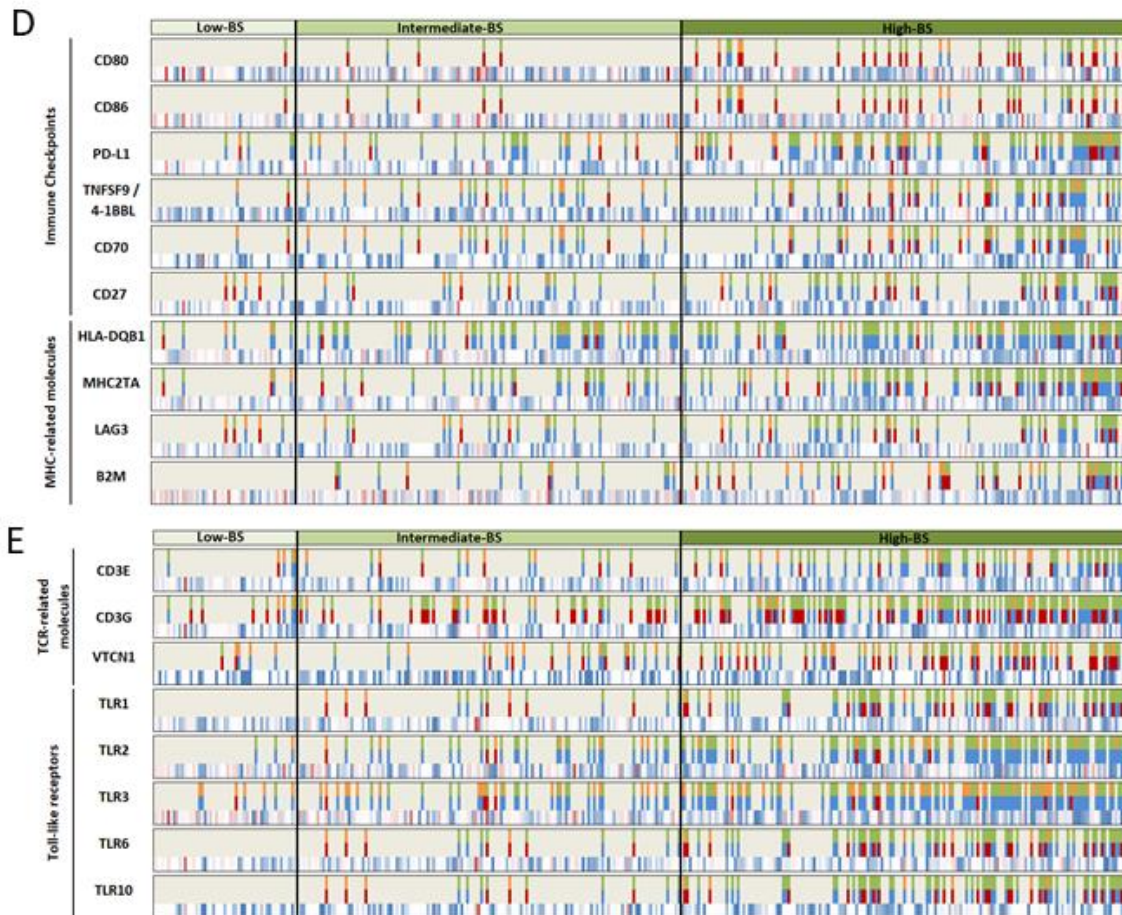

**Supplementary Figure 7. Candidate determinants of immune profiles observed for low-BS and high-BS HCC tumors.** (A, B) Heatmaps displaying enrichment copy number losses and uniparental disomies (UPDs) –also referred to as copy neutral losses of heterozygosity (CN-LOH)– containing immune-related genes in high-BS tumors in the discovery cohort. Alterations of specific immune-related genes were estimated using the refined copy number segmented data obtained using CNApp. (C, D) Enrichment of copy number losses in immune-related genes in high-BS tumors from the validation cohort.

# Supplementary Figure 8

**A**

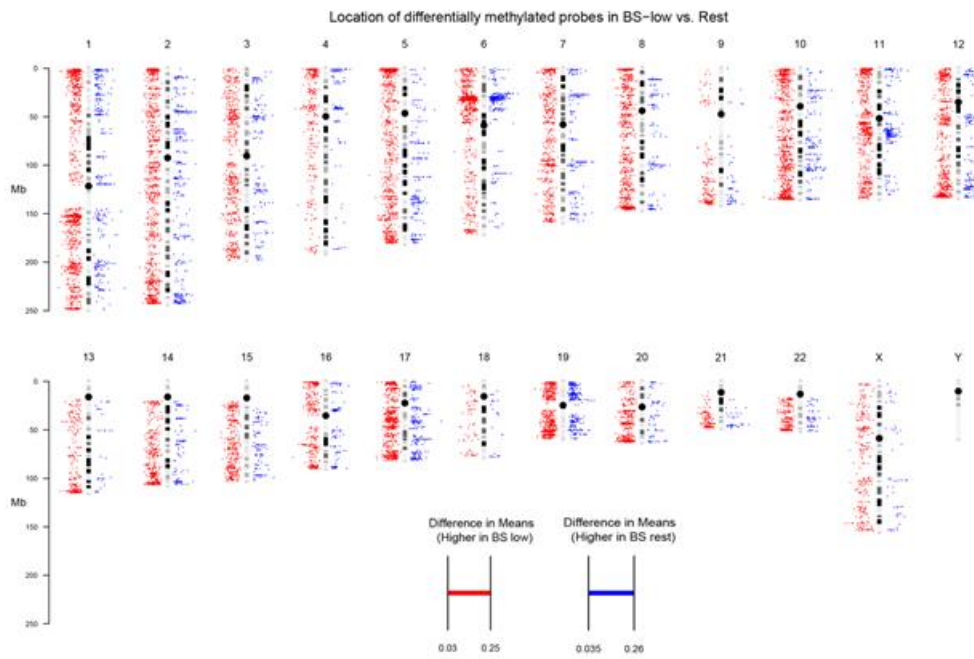

**B**

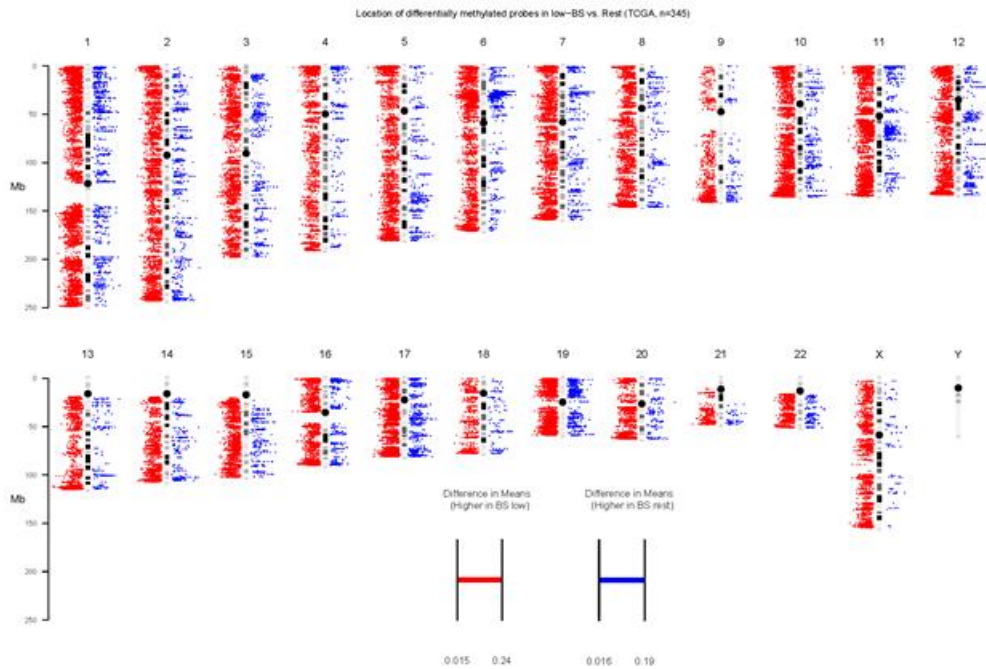



**Supplementary Figure 8. High-BS HCCs present widespread demethylation.**

Genome-wide plot of the discovery (A) and validation (B) cohorts displaying probes differentially methylated in low-BS tumors vs. rest. Probes in red are the ones that were more methylated in low-BS than in non-low-BS tumors. Probes in blue are the ones that were less methylated in low-BS vs rest. The distance to the chromosome represents the difference between the compared means. Plotted were only these probes that were differentially methylated using and  $FDR < 0.05$ .

## Supplementary Figure 9

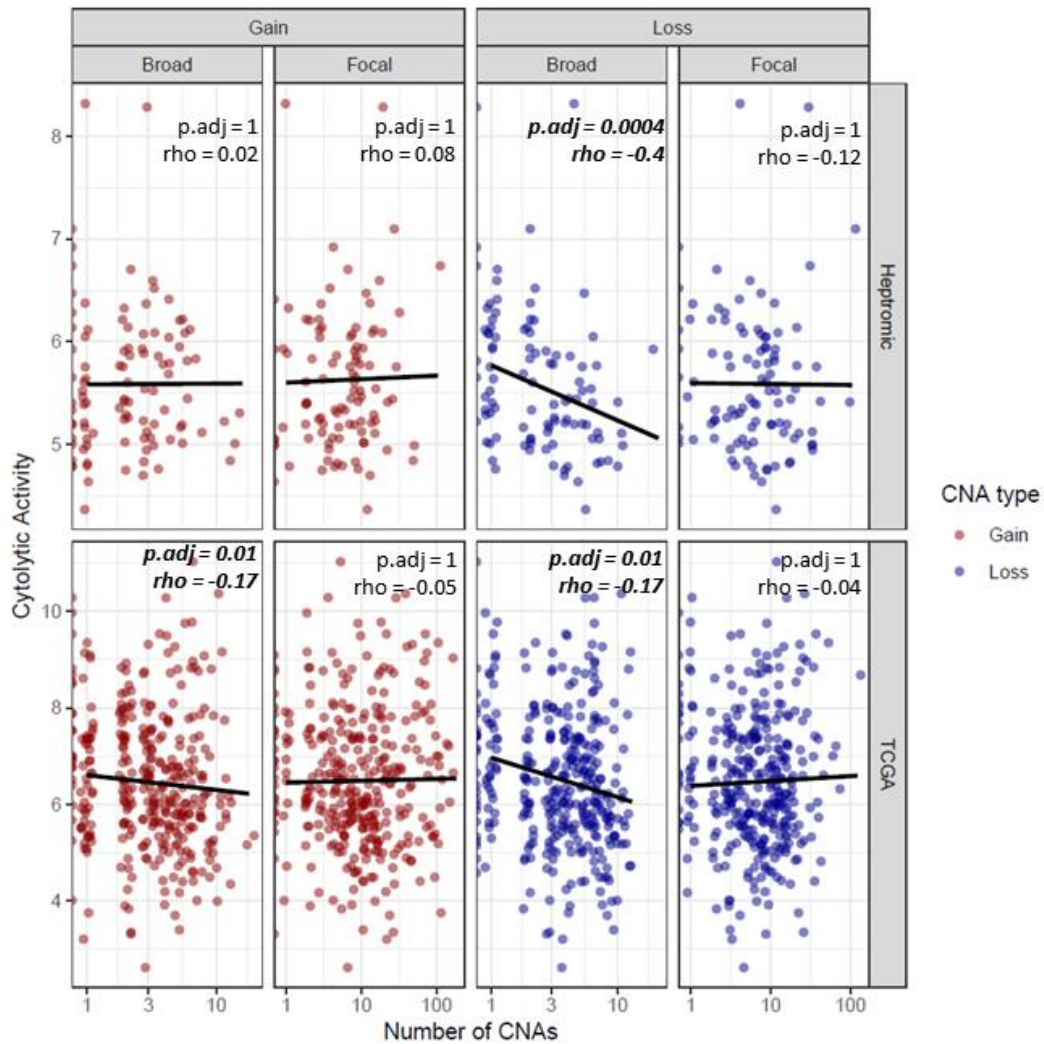

**Supplementary Figure 9. Number of broad losses correlate with low cytolytic activity in HCC.** Number of CNAs is represented in a logarithmic scale. Correlation degree was evaluated using the Spearman regression coefficient. Significance was evaluated using the adjusted p value.

**Supplementary Table 1: Clinico-pathological features of HCC patients:**

| Variable                               | HEPTROMIC (n=107) | LIHC-TCGA (n=345)  | p-value              |
|----------------------------------------|-------------------|--------------------|----------------------|
| <b>Age (years)</b>                     |                   |                    |                      |
| median (range)                         | 66 (41-83)        | 61 (52-69)         | $2.6 \cdot 10^{-5}$  |
| ≥65 years, n (%)                       | 62 (58)           | 146 (42)           | 0.005                |
| <b>Gender</b>                          |                   |                    |                      |
| Males, n (%)                           | 83 (78)           | 235 (68)           | ns                   |
| Females, n (%)                         | 24 (22)           | 110 (32)           |                      |
| <b>Etiology</b>                        |                   |                    |                      |
| Hepatitis B, n (%)                     | 24 (23)           | 77 (32)            | ns                   |
| Hepatitis C, n (%)                     | 48 (46)           | 30 (12)            | $3.6 \cdot 10^{-11}$ |
| Alcohol, n (%)                         | 14 (13)           | 110 (45)           | $1.4 \cdot 10^{-8}$  |
| NASH, n (%)                            | 7 (7)             | 12 (5)             | ns                   |
| Other, n (%)                           | 12 (11)           | 15 (6)             | ns                   |
| <b>Tumor stage</b>                     |                   |                    |                      |
| <b>BCLC</b>                            |                   |                    |                      |
| BCLC 0, n (%)                          | 12 (11)           | -                  |                      |
| BCLC A, n (%)                          | 80 (75)           | -                  |                      |
| BCLC B, n (%)                          | 8 (8)             | -                  |                      |
| BCLC C, n (%)                          | 6 (6)             | -                  |                      |
| <b>AJCC</b>                            |                   |                    |                      |
| T1, n (%)                              | -                 | 169 (49)           |                      |
| T2, n (%)                              | -                 | 88 (26)            |                      |
| T3, n (%)                              | -                 | 73 (21)            |                      |
| T4, n (%)                              | -                 | 12 (4)             |                      |
| <b>Child-Pugh score</b>                |                   |                    |                      |
| A, n (%)                               | 104 (98)          | 206 (91)           | 0.01                 |
| B, n (%)                               | 2 (2)             | 21 (9)             |                      |
| <b>Tumor size (cm)</b>                 |                   |                    |                      |
| ≤ 2 cm, n (%)                          | 18 (17)           | -                  |                      |
| >2 - <3 cm, n (%)                      | 15 (14)           | -                  |                      |
| ≥ 3 cm, n (%)                          | 73 (69)           | -                  |                      |
| <b>Number of nodules</b>               |                   |                    |                      |
| Single nodule, n (%)                   | 82 (77)           | -                  |                      |
| Multiple nodules, n (%)                | 25 (23)           | -                  |                      |
| <b>Vascular invasion</b>               |                   |                    |                      |
| Yes, n (%)                             | 38 (36)           | 103 (35)           | ns                   |
| No, n (%)                              | 67 (64)           | 193 (65)           |                      |
| <b>Tumor satellites</b>                |                   |                    |                      |
| Yes, n (%)                             | 26 (24)           | -                  |                      |
| No, n (%)                              | 81 (76)           | -                  |                      |
| <b>Degree of tumor differentiation</b> |                   |                    |                      |
| Well differentiated, n (%)             | 13 (16)           | 43 (13)            | ns                   |
| Moderately differentiated, n (%)       | 50 (60)           | 168 (49)           | ns                   |
| Poorly differentiated, n (%)           | 20 (24)           | 118 (38)           | 0.02                 |
| <b>Bilirubin (mg/dl)</b>               |                   |                    |                      |
| median (range)                         | 1.1 (0.3 – 3.2)   | 0.7 (0.1 - 9)      | $5.8 \cdot 10^{-8}$  |
| > 1 mg/dl, n (%)                       | 49 (46)           | 62 (22)            | $3 \cdot 10^{-6}$    |
| <b>Albumin (g/l)</b>                   |                   |                    |                      |
| median (range)                         | 4.1 (2.4 - 5.5)   | 4 (0.2 - 6.9)      | 0.02                 |
| < 3.5 g/l, n (%)                       | 14 (13)           | 69 (25)            | 0.02                 |
| <b>Platelet count</b>                  |                   |                    |                      |
| median (range)                         | 156 (33 - 373)    | 200.5 (4 - 608)    | $1.7 \cdot 10^{-12}$ |
| < 100,000/mm <sup>3</sup> , n (%)      | 19 (18)           | 19 (6)             | 0.0003               |
| <b>AFP (mg/dl)</b>                     |                   |                    |                      |
| median (range)                         | 10.5 (0 – 71,770) | 16 (1 – 2,035,400) | ns                   |
| > 400 mg/dl, n (%)                     | 16 (15)           | 63 (24)            |                      |

\*Number of patients with available data in Heptromic/TCGA: Etiology, 105/244; Tumor stage: 106/342; Child-Pugh score, 106/227; Tumor size, 106/NA; Vascular invasion, 105/296; Degree of differentiation, 83/340; Bilirubin, 106/285; Albumin, 106/281; Platelet count, 106/286; AFP, 106/262

**Supplementary Table 2: Descriptive analysis of broad score (left) and focal score (right) distributions in the TCGA pan-cancer cohort (n = 10,635).**

| Cancer type | Min. | P25  | P50  | Mean | P75  | Max. | Cancer type | Min. | P25  | P50  | Mean  | P75  | Max. |
|-------------|------|------|------|------|------|------|-------------|------|------|------|-------|------|------|
| LAML        | 0    | 0    | 0    | 0.9  | 1    | 14   | LAML        | 13   | 35   | 46   | 102.6 | 63   | 2614 |
| THCA        | 0    | 0    | 0    | 0.7  | 1    | 17   | THCA        | 6    | 21   | 27   | 31.0  | 34   | 438  |
| THYM        | 0    | 0    | 0    | 1.5  | 1    | 31   | THYM        | 15   | 26.8 | 34.5 | 40.0  | 46   | 243  |
| PRAD        | 0    | 0    | 1    | 2.3  | 3    | 20   | PRAD        | 5    | 43   | 68   | 88.7  | 103  | 1101 |
| UCEC        | 0    | 0    | 2    | 4.9  | 7    | 31   | UCEC        | 9    | 31   | 48   | 158.7 | 276  | 1028 |
| DLBC        | 0    | 1    | 3    | 4.5  | 6.25 | 20   | DLBC        | 27   | 53   | 77.5 | 95.2  | 104  | 442  |
| LGG         | 0    | 2    | 3    | 3.8  | 5    | 31   | LGG         | 11   | 31.3 | 46   | 60.6  | 69   | 637  |
| PAAD        | 0    | 0    | 3    | 5.0  | 8    | 29   | PAAD        | 14   | 33   | 58.5 | 72.8  | 99.3 | 398  |
| KIRC        | 0    | 2    | 4    | 5.4  | 7    | 31   | KIRC        | 6    | 32   | 43   | 60.9  | 67.8 | 432  |
| PCPG        | 0    | 2    | 4    | 4.9  | 6    | 33   | PCPG        | 15   | 34   | 50   | 91.2  | 76   | 1002 |
| MESO        | 0    | 3    | 5    | 7.3  | 10   | 29   | MESO        | 10   | 44.5 | 80   | 88.9  | 118  | 219  |
| STAD        | 0    | 1    | 5    | 6.5  | 10   | 34   | STAD        | 6    | 50.3 | 127  | 184.4 | 262  | 1520 |
| UVM         | 0    | 3    | 5.5  | 6.4  | 9    | 21   | UVM         | 23   | 36   | 47.5 | 58.8  | 65.3 | 390  |
| GBM         | 0    | 4    | 6    | 6.7  | 8    | 30   | GBM         | 16   | 79   | 113  | 129.5 | 154  | 1012 |
| KIRP        | 0    | 3    | 6    | 7.4  | 9    | 35   | KIRP        | 7    | 30   | 41   | 57.9  | 64.8 | 505  |
| BRCA        | 0    | 4    | 7    | 8.8  | 12   | 36   | BRCA        | 9    | 63   | 155  | 206.1 | 290  | 2126 |
| BLCA        | 0    | 4    | 8    | 8.7  | 13   | 25   | BLCA        | 16   | 80.3 | 155  | 202.8 | 274  | 1728 |
| CESC        | 0    | 5    | 8    | 9.3  | 12   | 33   | CESC        | 19   | 59.5 | 95   | 115.3 | 140  | 602  |
| HNSC        | 0    | 4    | 8    | 8.3  | 11   | 31   | HNSC        | 11   | 61   | 106  | 128.7 | 165  | 543  |
| LIHC        | 0    | 5    | 8    | 9.5  | 13   | 34   | LIHC        | 12   | 55.5 | 92   | 120.7 | 155  | 785  |
| LUAD        | 0    | 3    | 8    | 8.2  | 12   | 28   | LUAD        | 16   | 67.3 | 120  | 158.0 | 226  | 1037 |
| SKCM        | 0    | 5    | 8    | 9.8  | 13.3 | 32   | SKCM        | 21   | 58   | 102  | 139.0 | 196  | 580  |
| COAD        | 0    | 3    | 9    | 8.8  | 13   | 32   | COAD        | 14   | 54   | 102  | 120.7 | 155  | 977  |
| SARC        | 0    | 3    | 9    | 9.9  | 15   | 34   | SARC        | 17   | 102  | 248  | 295.6 | 416  | 1249 |
| ESCA        | 0    | 7    | 10   | 10.3 | 14   | 26   | ESCA        | 23   | 144  | 233  | 251.5 | 322  | 733  |
| CHOL        | 0    | 6.75 | 10.5 | 10.9 | 15.3 | 25   | CHOL        | 34   | 56.5 | 80.5 | 96.4  | 127  | 245  |
| LUSC        | 0    | 7    | 11   | 12.0 | 16.5 | 35   | LUSC        | 14   | 118  | 185  | 225.1 | 278  | 2313 |
| OV          | 0    | 8    | 12   | 13.0 | 18   | 40   | OV          | 29   | 268  | 398  | 450.1 | 548  | 2507 |
| READ        | 0    | 8.75 | 12   | 12.2 | 16   | 32   | READ        | 25   | 73   | 132  | 143.7 | 181  | 696  |
| UCS         | 0    | 10.8 | 13.5 | 14.7 | 19   | 35   | UCS         | 40   | 230  | 361  | 363.6 | 489  | 865  |
| TGCT        | 0    | 7    | 15   | 13.4 | 18   | 32   | TGCT        | 21   | 59   | 87   | 102.5 | 130  | 406  |
| ACC         | 0    | 9.25 | 18   | 18.1 | 27   | 42   | ACC         | 12   | 68.3 | 131  | 183.0 | 220  | 936  |
| KICH        | 0    | 23.3 | 27   | 23.7 | 29   | 34   | KICH        | 15   | 35.5 | 51   | 62.5  | 64.8 | 304  |

**Supplementary Table 3:** Excel sheet presenting the INGENUITY® Pathway Analysis of the discovery cohort according to broad scores.

**Supplementary Table 4:** Excel sheet with the clinico-pathological data displayed according to BS and FS.

**Supplementary Table 5: Molecular and immune characterization of the discovery cohort according to broad scores (BS).** Gene-based signatures were analyzed either by Nearest Template Prediction[14] or ssGSEA[13] Gene Pattern modules. Values in each row represent the proportion of samples indicated in the row category that are classified as low-BS or high-BS. E.g. Out of 23 samples classified as positive for the HCC Immune Class, 39% were low-BS and 9% were high-BS.

| Variables                               |                                  | Low-BS<br>(n=24) | High-BS<br>(n=25) | p-value     |             |              |
|-----------------------------------------|----------------------------------|------------------|-------------------|-------------|-------------|--------------|
|                                         |                                  |                  |                   | Low vs High | Low vs Rest | High vs Rest |
| HCC Immune Class <sup>1,+</sup>         | / positive                       | 9 (43%)          | 2 (8%)            | 0.02        | 0.02        | ns           |
|                                         | / negative                       | 12 (57%)         | 22 (92%)          |             |             |              |
| Active Immune Subtype <sup>1,+</sup>    | / positive                       | 6 (29%)          | 0 (0%)            | 0.007       | ns          | 0.01         |
|                                         | / negative                       | 15 (71%)         | 24 (100%)         |             |             |              |
| Exhausted Immune Subtype <sup>1,+</sup> | / positive                       | 3 (14%)          | 2 (8%)            | 0.65        | 0.151       | 1            |
|                                         | / negative                       | 18 (86%)         | 22 (92%)          |             |             |              |
| Proliferation S2 <sup>2,+</sup>         | / positive                       | 0 (0%)           | 6 (25%)           | 0.02        | 0.006       | ns           |
|                                         | / negative                       | 21 (100%)        | 18 (75%)          |             |             |              |
| Ploidy                                  | Diploids                         | 21 (88%)         | 8 (32%)           | <0.001      | 0.002       | 0.002        |
|                                         | Polyploids                       | 3 (12%)          | 17 (68%)          |             |             |              |
| TLS count (> 5) *                       |                                  | 12 (50%)         | 6 (24%)           | 0.067       | ns          | 0.089        |
| DNA repair mechanisms<br>(ssGSEA) +     | p53 pathway activation           |                  |                   | 0.01        | 0.02        | ns           |
|                                         | Hallmark DNA repair              |                  |                   | 0.006       | 0.009       | ns           |
|                                         | Mismatch Repair (MMR)            |                  |                   | 0.03        | 0.03        | ns           |
|                                         | Nucleotide Excision Repair (NER) |                  |                   | 0.047       | 0.03        | ns           |
|                                         | Base-Excision Repair (BER)       |                  |                   | 0.03        | 0.03        | ns           |
|                                         | Chromosome maintenance           |                  |                   | 0.01        | 0.001       | ns           |
|                                         | Cell cycle progression           |                  |                   | 0.047       | 0.01        | ns           |
| Proliferation signatures<br>(ssGSEA) +  | DNA replication                  |                  |                   | 0.03        | 0.03        | ns           |
|                                         | DNA strand elongation            |                  |                   | 0.047       | 0.01        | ns           |
|                                         | MTORC1-mediated signaling        |                  |                   | 0.04        | 0.006       | ns           |

<sup>1</sup> Sia et al. Gastroenterology 2017

<sup>2</sup> Hoshida Y et al. Cancer Res 2009

\* histopathological data

\*\* clinical data

+ Expression data available for 21 BS-low and 24 BS-high

**Supplementary Table 6: Molecular and immune characterization of the validation cohort according to the broad scores (BS).** Gene-based signatures were analyzed either by Nearest Template Prediction[14] or ssGSEA[13] both Gene Pattern Modules.

| Variables                             |                                   | Low-BS<br>(n=51) | High-BS<br>(n=158) | p-value     |             |              |
|---------------------------------------|-----------------------------------|------------------|--------------------|-------------|-------------|--------------|
|                                       |                                   |                  |                    | Low vs High | Low vs Rest | High vs Rest |
| HCC Immune Class <sup>1</sup>         | / positive                        | 19 (31%)         | 27 (17%)           | 0.004       | 0.02        | 0.01         |
|                                       | / negative                        | 32 (69%)         | 131 (83%)          |             |             |              |
| Active Immune Subtype <sup>1</sup>    | / positive                        | 8 (16%)          | 15 (9%)            | ns          | ns          | ns           |
|                                       | / negative                        | 43 (84%)         | 143 (91%)          |             |             |              |
| Exhausted Immune Subtype <sup>1</sup> | / positive                        | 11 (22%)         | 12 (8%)            | 0.01        | 0.033       | 0.029        |
|                                       | / negative                        | 40 (88%)         | 146 (92%)          |             |             |              |
| Inflammation Class <sup>2</sup>       | / positive                        | 12 (24%)         | 6 (4%)             | <0.0001     | 0.01        | <0.0001      |
|                                       | / negative                        | 39 (76%)         | 152 (96%)          |             |             |              |
| Proliferation Class <sup>2</sup>      | / positive                        | 7 (14%)          | 61 (39%)           | 0.001       | 0.01        | 0.0002       |
|                                       | / negative                        | 44 (86%)         | 97 (61%)           |             |             |              |
| Proliferation (S1+S2) <sup>3</sup>    | / positive                        | 15 (29%)         | 82 (52%)           | 0.008       | 0.04        | 0.004        |
|                                       | / negative                        | 36 (71%)         | 76 (48%)           |             |             |              |
| Ploidy                                | Diploids                          | 7 (14%)          | 89 (56%)           | <0.0001     | <0.0001     | <0.0001      |
|                                       | Polyploids                        | 44 (86%)         | 69 (44%)           |             |             |              |
| TP53 mutations <sup>+</sup>           | TP53-mut                          | 4 (8%)           | 60 (38%)           | <0.0001     | <0.0001     | <0.0001      |
|                                       | TP53-wt                           | 47 (92%)         | 96 (62%)           |             |             |              |
| DNA repair mechanisms (ssGSEA)        | p53 pathway activation            |                  |                    | 0.02        | ns          | 0.01         |
|                                       | Hallmark DNA repair               |                  |                    | <0.0001     | <0.0001     | <0.0001      |
|                                       | Mismatch Repair (MMR)             |                  |                    | <0.0001     | <0.0001     | <0.0001      |
|                                       | Nucleotide Excision Repair (NER)  |                  |                    | <0.0001     | 0.0001      | <0.0001      |
|                                       | Base-Excision Repair (BER)        |                  |                    | <0.0001     | <0.0001     | <0.0001      |
|                                       | Homologous Recombination (HR)     |                  |                    | <0.0001     | <0.0001     | <0.0001      |
|                                       | Non-Homologous End-Joining (NHEJ) |                  |                    | <0.0001     | 0.0001      | <0.0001      |
| Proliferation signatures (ssGSEA)     | DNA replication                   |                  |                    | <0.0001     | <0.0001     | <0.0001      |
|                                       | Cell cycle progression            |                  |                    | <0.0001     | <0.0001     | <0.0001      |
|                                       | MTORC1-mediated signaling         |                  |                    | 0.002       | 0.02        | 0.002        |

<sup>1</sup> Sia et al. Gastroenterology 2017

<sup>2</sup> Chiang et al., Cancer Res 2008

<sup>3</sup> Hoshida et al. Cancer Res 2009

+ 156 Samples available with TP53 mutations in BS-high

**Supplementary Table 7: Molecular and immune characterization of the discovery cohort according to focal scores (FS).** Gene-based signatures were analyzed either by Nearest Template Prediction (NTP) [14] or ssGSEA[13] Gene Pattern modules.

| Variables                                           |            | High-FS<br>(n=27) | FS Rest<br>(n=80) | p-value |
|-----------------------------------------------------|------------|-------------------|-------------------|---------|
| HCC Immune Class <sup>1,+</sup>                     | / positive | 7 (27%)           | 16 (21%)          | ns      |
|                                                     | / negative | 19 (73%)          | 60 (79%)          |         |
| Proliferation Class <sup>2,+</sup>                  | / positive | 13 (50%)          | 11 (14%)          | 0.001   |
|                                                     | / negative | 13 (50%)          | 57 (86%)          |         |
| CTNNB1 Class <sup>2,+</sup>                         | / positive | 2 (8%)            | 23 (30%)          | 0.03    |
|                                                     | / negative | 24 (32%)          | 53 (70%)          |         |
| Late-TGFβ signalling <sup>3,+</sup>                 | / positive | 13 (46%)          | 15 (54%)          | 0.005   |
|                                                     | / negative | 13 (18%)          | 61 (82%)          |         |
| Vascular invasion signature <sup>4,+</sup>          | / positive | 13 (50%)          | 18 (24%)          | 0.02    |
|                                                     | / negative | 13 (50%)          | 58 (76%)          |         |
| Poor survival signature <sup>5,+</sup>              | / positive | 13 (50%)          | 14 (18%)          | 0.004   |
|                                                     | / negative | 13 (50%)          | 62 (82%)          |         |
| Poor prognosis MET-related signature <sup>6,+</sup> | / positive | 6 (23%)           | 5 (7%)            | 0.03    |
|                                                     | / negative | 20 (77%)          | 71 (93%)          |         |
| Proliferation linked to RB1 LOF <sup>7,+</sup>      | / positive | 12 (46%)          | 12 (16%)          | 0.003   |
|                                                     | / negative | 14 (54%)          | 64 (84%)          |         |
| Progenitor cell CK19 signature <sup>8,+</sup>       | / positive | 13 (50%)          | 17 (22%)          | 0.01    |
|                                                     | / negative | 13 (50%)          | 59 (78%)          |         |
| Fibrosis <sup>++</sup>                              | F4         | 6 (16%)           | 31 (84%)          | 0.045   |
|                                                     | F0-F3      | 8 (44%)           | 10 (56%)          |         |
| Poor differentiation*                               | / positive | 11 (41%)          | 9 (11%)           | 0.0003  |
|                                                     | / negative | 16 (59%)          | 71 (89%)          |         |

<sup>1</sup> Sia et al. Gastroenterology 2017

<sup>2</sup> Chiang et al. Cancer Res 2008

<sup>3</sup> Coulouarn et al. Hepatology 2008

<sup>4</sup> Mínguez et al. J Hepatology 2011

<sup>5</sup> Lee et al. Hepatology 2004

<sup>6</sup> Kaposi-Novak et al. J Clin Invest 2006

<sup>7</sup> Bollard et al. Gut 2017

<sup>8</sup> Villanueva et al. Gastroenterology 2008

\* Histopathological assessment

+ Expression data available for 102 tumors

++Data available for 55 patients



**Supplementary Table 8: Molecular and immune characterization of the validation cohort according to focal scores (FS).** Gene-based signatures were analyzed either by NTP[14] or ssGSEA[13] Gene Pattern modules.

| Variables                                                           |                                         | High-FS<br>(n=169) | FS Rest<br>(n=176) | p-value |
|---------------------------------------------------------------------|-----------------------------------------|--------------------|--------------------|---------|
| HCC immune class <sup>1,+</sup>                                     | / positive                              | 34/168 (20%)       | 46/174 (26%)       | ns      |
|                                                                     | / negative                              | 134/168 (80%)      | 128/174 (74%)      |         |
| Ploidy                                                              | Polyploid                               | 89/169 (53%)       | 52/176 (30%)       | <0.0001 |
|                                                                     | Diploid                                 | 80/169 (47%)       | 124/176 (70%)      |         |
| TP53 mutation <sup>+</sup>                                          | TP53-mut                                | 64/167 (38%)       | 33/174 (19%)       | 0.0001  |
|                                                                     | TP53-wt                                 | 103/167 (62%)      | 141/174 (81%)      |         |
| CTNNB1 mutation <sup>+</sup>                                        | CTNNB1-mut                              | 27/167 (16%)       | 67/174 (39%)       | <0.0001 |
|                                                                     | CTNNB1-wt                               | 140/167 (84%)      | 107/174 (61%)      |         |
| Proliferation class <sup>2,+</sup>                                  | / positive                              | 64/168 (38%)       | 34/174 (20%)       | 0.0002  |
|                                                                     | / negative                              | 104/168 (62%)      | 140/174 (80%)      |         |
| CTNNB1 class <sup>2,+</sup>                                         | / positive                              | 16/168 (10%)       | 47/174 (27%)       | <0.0001 |
|                                                                     | / negative                              | 152/168 (90%)      | 127/174 (73%)      |         |
| Poor survival <sup>3,+</sup>                                        | / positive                              | 57/168 (34%)       | 36/174 (21%)       | 0.009   |
|                                                                     | / negative                              | 111/168 (66%)      | 138/174 (79%)      |         |
| Poor prognosis Met-related signature <sup>4,+</sup>                 | / positive                              | 50/168 (30%)       | 34/174 (20%)       | 0.03    |
|                                                                     | / negative                              | 118/168 (70%)      | 140/174 (80%)      |         |
| Proliferation linked to RB1 LOF <sup>5,+</sup>                      | / positive                              | 69/168 (41%)       | 34/174 (20%)       | <0.0001 |
|                                                                     | / negative                              | 99/168 (59%)       | 140/174 (80%)      |         |
| Progenitor cell CK19 poor prognosis signature <sup>6,+</sup>        | / positive                              | 82/168 (49%)       | 54/174 (31%)       | 0.001   |
|                                                                     | / negative                              | 86/168 (51%)       | 120/174 (69%)      |         |
| Poor differentiation <sup>*,+</sup>                                 | / positive                              | 74/167 (44%)       | 55/173 (32%)       | 0.02    |
|                                                                     | / negative                              | 93/167 (56%)       | 118/173 (68%)      |         |
| DNA damage repair signatures (ssGSEA) <sup>+</sup>                  | Hallmark DNA repair                     |                    |                    | 0.04    |
|                                                                     | Mismatch Repair (MMR)                   |                    |                    | <0.0001 |
|                                                                     | Nucleotide Excision Repair (NER)        |                    |                    | <0.0001 |
|                                                                     | Base-Excision Repair (BER)              |                    |                    | <0.0001 |
| Proliferation and $\beta$ -catenin signatures (ssGSEA) <sup>+</sup> | Homologous Recombination (HR)           |                    |                    | <0.0001 |
|                                                                     | Cell cycle progression                  |                    |                    | <0.0001 |
|                                                                     | DNA replication                         |                    |                    | <0.0001 |
|                                                                     | Hallmark Wnt- $\beta$ -catenin activity |                    |                    | 0.002   |

<sup>1</sup> Sia et al. Gastroenterology 2017

<sup>2</sup> Chiang et al. Cancer Res. 2008

<sup>3</sup> Lee et al. Hepatology 2004

<sup>4</sup> Kaposi-Novak et al. J Clin Invest 2006

<sup>5</sup> Bollard et al. Gut 2017

<sup>6</sup> Villanueva et al. Gastroenterology 2008

\* Histopathological assessment

<sup>+</sup> Expression data available for 342 tumors, mutational data available for 341, and histopathological data available for 340.

**Supplementary Table 9: Description of the immune clusters.** Gene groups representing immune clusters as major determinants of immunogenicity, according to [15] and [16].

| Immune clusters               |                                       | Genes                                                                                                                                                                                       |
|-------------------------------|---------------------------------------|---------------------------------------------------------------------------------------------------------------------------------------------------------------------------------------------|
| <b>MHC</b>                    |                                       | B2M, TAP1, TAP2, HLA-A, HLA-B, HLA-C, HLA-DPA1, HLA-DPB1, HLA-E, HLA-F                                                                                                                      |
| <b>CP / IM</b>                |                                       | PDCD1, CTLA4, LAG3, TIGIT, HAVCR2, CD274, PDCD1LG2, CD27, ICOS, IDO1                                                                                                                        |
| <b>Effector Cells (ECs)</b>   | <b>Act CD4<sup>+</sup></b>            | AIM2, BIRC3, BRIP1, CCL20, CCL4, CCL5, CCNB1, CCR7, DUSP2, ESCO2, ETS1, EXO1, EXOC6, IARS, KIF11, KNTC1, NUF2, PRC1, PSAT1, RGS1, RTKN2, SAMS1, SELL, TRAT1                                 |
|                               | <b>Act CD8<sup>+</sup></b>            | ADRM1, AHS1, C1GALT1C1, CCT6B, CD37, CD3D, CD3E, CD3G, CD69, CD8A, CETN3, CSE1L, GEMIN6, GNLY, GPT2, GZMA, GZMH, GZMK, IL2RB, LCK, MPZL1, NKG7, PIK3IP1, PTRH2, TIMM13, ZAP70               |
|                               | <b>T<sub>em</sub> CD4<sup>+</sup></b> | ATM, CASP3, CASQ1, CD300E, DARS, DOCK9, EXOSC9, EZH2, GDE1, IL34, NCOA4, NEFL, PDGFRL, PTGS1, REPS1, SCG2, SDPR, SIGLEC14, SIGLEC6, TAL1, TFEC, TIPIN, TPK1, UQCRB, USP9Y, WIPF1, ZCRB1     |
|                               | <b>T<sub>em</sub> CD8<sup>+</sup></b> | ACAP1, APOL3, ARHGAP10, ATP10D, C3AR1, CCR5, CD160, CD55, CFLAR, CMKLR1, DAPP1, FCRL6, FLT3LG, GZMM, HAPLN3, HLA_DMB, HLA_DPA1.1, HLA_DPB1.1, IFI16, LIME1, LTK, NFKBIA, SETD7, SIK1, TRIB2 |
| <b>Suppressor cells (SCs)</b> | <b>MDSC</b>                           | CCR2, CD14, CD2, CD86, CXCR4, FCGR2A, FCGR2B, FCGR3A, FERMT3, GPSM3, IL18BP, IL4R, ITGAL, ITGAM, PARVG, PSAP, PTGER2, PTGES2, S100A8, S100A9                                                |
|                               | <b>T-reg</b>                          | CCL3L1, CD72, CLEC5A, FOXP3, ITGA4, L1CAM, LIPA, LRP1, LRRC42, MARCO, MMP12, MNDA, MRC1, MS4A6A, PELO, PLEK, PRSS23, PTGIR, ST8SIA4, STAB1                                                  |

**Notes:** List of genes adapted from [15] and [16]. MHC: Major Histocompatibility Complex; CP/IM: checkpoints / immune-modulators; MDSC: Myeloid-derived suppressive cells; T-reg: Regulatory T cells; Tem: Effector Memory T cells; Act: Activated T cells.

**Supplementary Table 10: Publicly-available gene signatures used in the study.** Signatures not specifically listed in the table were obtained from the Gene Set Enrichment Analysis (GSEA) Molecular Signatures Database (MSigDB).

| Name used to refer to the gene signature     | Reference                                    |
|----------------------------------------------|----------------------------------------------|
| Proliferation linked to RB1 LOF              | Bollard et al. Gut 2017 [18]                 |
| Proliferation Class                          | Chiang et al. Cancer Res 2008 [19]           |
| CTNNB1 Class                                 |                                              |
| Inflammation Class                           |                                              |
| Late-TGF $\beta$ signaling                   | Coulouarn et al. Hepatology 2008 [20]        |
| TGF- $\beta$ signaling                       |                                              |
| HCC proliferation subclass (S1+S2)           | Hoshida Y et al. Cancer Res 2009 [21]        |
| Proliferation S2 subclass / Proliferation S2 |                                              |
| HCC S3 non-proliferation subclass            |                                              |
| Poor prognosis MET-related signaling         | Kaposi-Novak et al. J Clin Invest 2006 [22]  |
| Poor survival signature                      | Lee et al. Hepatology 2004 [23]              |
| Vascular invasion signature                  | Mínguez et al. J Hepatology 2011 [24]        |
| HCC Immune Class                             | Sia et al. Gastroenterology 2017 [25]        |
| Active Immune Subtype                        |                                              |
| Exhausted Immune Subtype                     |                                              |
| Progenitor cell CK19 signature               | Villanueva et al. Gastroenterology 2008 [26] |
| Notch signaling                              | Villanueva et al. Gastroenterology 2012 [27] |
| EPCAM signaling                              | Yamashita et al. Cancer Res. 2008 [28]       |

## **References**

1. Villanueva A, Portela A, Sayols S, Battiston C, Hoshida Y, Méndez-González J, et al. DNA methylation-based prognosis and epidrivers in hepatocellular carcinoma. *Hepatology* 2015;61:1945–1956.
2. Ally A, Balasundaram M, Carlsen R, Chuah E, Clarke A, Dhalla N, et al. Comprehensive and Integrative Genomic Characterization of Hepatocellular Carcinoma. *Cell* 2017;169:1327-1341.e23.
3. Torrecilla S, Sia D, Harrington AN, Zhang Z, Cabellos L, Cornella H, et al. Trunk mutational events present minimal intra- and inter-tumoral heterogeneity in hepatocellular carcinoma. *J Hepatol* 2017;67:1222–1231.
4. Prat A, Navarro A, Paré L, Reguart N, Galván P, Pascual T, et al. Immune-related gene expression profiling after PD-1 blockade in non–small cell lung carcinoma, head and neck squamous cell carcinoma, and melanoma. *Cancer Res* 2017;77:3540–3550.
5. Zhang Z, Hao K. SAAS-CNV: A Joint Segmentation Approach on Aggregated and Allele Specific Signals for the Identification of Somatic Copy Number Alterations with Next-Generation Sequencing Data. *PLOS Comput Biol* 2015;11:e1004618.
6. Van Loo P, Nordgard SH, Lingjærde OC, Russnes HG, Rye IH, Sun W, et al. Allele-specific copy number analysis of tumors. *Proc Natl Acad Sci* 2010;107:16910–16915.
7. Tate JG, Bamford S, Jubb HC, Sondka Z, Beare DM, Bindal N, et al. COSMIC: the Catalogue Of Somatic Mutations In Cancer. *Nucleic Acids Res* 2018;47:D941–D947.
8. Aran D, Sirota M, Butte AJ. Systematic pan-cancer analysis of tumour purity. *Nat Commun* 2015;6:8971.

9. Franch-Expósito S, Bassaganyas L, Vila-Casadesús M, Hernández-Illán E, Esteban-Fabro R, Díaz-Gay M, et al. CNApp, a tool for the quantification of copy number alterations and integrative analysis revealing clinical implications. *Elife* 2020; 9:e50267.
10. Davoli T, Uno H, Wooten EC, Elledge SJ. Tumor aneuploidy correlates with markers of immune evasion and with reduced response to immunotherapy. *Science* 2017;355:eaaf8399.
11. Taylor AM, Shih J, Ha G, Gao GF, Zhang X, Berger AC, et al. Genomic and Functional Approaches to Understanding Cancer Aneuploidy. *Cancer Cell* 2018;33:676-689.e3.
12. Subramanian A, Tamayo P, Mootha VK, Mukherjee S, Ebert BL, Gillette MA, et al. Gene set enrichment analysis: a knowledge-based approach for interpreting genome-wide expression profiles. *Proc Natl Acad Sci U S A* 2005;102:15545–50.
13. Barbie DA, Tamayo P, Boehm JS, Kim SY, Moody SE, Dunn IF, et al. Systematic RNA interference reveals that oncogenic KRAS-driven cancers require TBK1. *Nature* 2009;462:108–12.
14. Hoshida Y, Villanueva A, Kobayashi M, Peix J, Chiang DY, Camargo A, et al. Gene expression in fixed tissues and outcome in hepatocellular carcinoma. *N Engl J Med* 2008;359:1995–2004.
15. Charoentong P, Finotello F, Angelova M, Mayer C, Efremova M, Rieder D, et al. Pan-cancer Immunogenomic Analyses Reveal Genotype-Immunophenotype Relationships and Predictors of Response to Checkpoint Blockade. *Cell Rep* 2017;18:248–262.

16. Rooney MS, Shukla SA, Wu CJJ, Getz G, Hacohen N. Molecular and genetic properties of tumors associated with local immune cytolytic activity. *Cell* 2015;160:48–61.
17. Yoshihara K, Shahmoradgoli M, Martínez E, Vegesna R, Kim H, Torres-Garcia W, et al. Inferring tumour purity and stromal and immune cell admixture from expression data. *Nat Commun* 2013;4:2612.
18. Bollard J, Miguela V, Ruiz de Galarreta M, Venkatesh A, Bian CB, Roberto MP, et al. No Title. *Gut* 2017;66:1286–1296.
19. Chiang DY, Villanueva A, Hoshida Y, Peix J, Newell P, Minguez B, et al. Focal gains of VEGFA and molecular classification of hepatocellular carcinoma. *Cancer Res* 2008;68:6779–88.
20. Coulouarn C, Factor VM, Thorgeirsson SS. Transforming growth factor-beta gene expression signature in mouse hepatocytes predicts clinical outcome in human cancer. *Hepatology* 2008;47:2059–2067.
21. Hoshida Y, Nijman SMBS, Kobayashi M, Chan J a, Brunet J-P, Chiang DY, et al. Integrative transcriptome analysis reveals common molecular subclasses of human hepatocellular carcinoma. *Cancer Res* 2009;69:7385–7392.
22. Kaposi-Novak P, Lee J-S, Gómez-Quiroz L, Coulouarn C, Factor VM, Thorgeirsson SS. Met-regulated expression signature defines a subset of human hepatocellular carcinomas with poor prognosis and aggressive phenotype. *J Clin Invest* 2006;116:1582–95.
23. Lee J-SS, Chu I-SS, Heo J, Calvisi DF, Sun Z, Roskams T, et al. Classification and prediction of survival in hepatocellular carcinoma by gene expression profiling. *Hepatology* 2004;40:667–676.

24. Mínguez B, Hoshida Y, Villanueva A, Toffanin S, Cabellos L, Thung S, et al. Gene-expression signature of vascular invasion in hepatocellular carcinoma. *J Hepatol* 2011;55:1325–1331.
25. Sia D, Jiao Y, Martinez-Quetglas I, Kuchuk O, Villacorta-Martin C, Castro de Moura M, et al. Identification of an Immune-specific Class of Hepatocellular Carcinoma, Based on Molecular Features. *Gastroenterology* 2017;153:812–826.
26. Villanueva A, Chiang DY, Newell P, Peix J, Thung S, Alsinet C, et al. Pivotal role of mTOR signaling in hepatocellular carcinoma. *Gastroenterology* 2008;135:1972–83, 1983 e1–11.
27. Villanueva A, Alsinet C, Yanger K, Hoshida Y, Zong Y, Toffanin S, et al. Notch signaling is activated in human hepatocellular carcinoma and induces tumor formation in mice. *Gastroenterology* 2012;143:1660-1669.e7.
28. Yamashita T, Forgues M, Wang W, Kim JW, Ye Q, Jia H, et al. EpCAM and alpha-Fetoprotein Expression Defines Novel Prognostic Subtypes of Hepatocellular Carcinoma. *Cancer Res* 2008;68:1451–1461.
